# Supplementary material
Source: PubMed Central journal article supplement (PMC8542629)
Supplement: NIHMS1737043-supplement-MMC1.pdf [file NIHMS1737043-supplement-MMC1.pdf]

1  
2  
3  
4  
5  
6  
7  
8  
9  
10  
11  
12  
13  
14  
15  
16  
17  
18  
19  
20  
21  
22  
23  
24  
25  
26  
27  
28  
29  
30  
31  
32  
33

***Supplemental Materials***

**Effects of Long-Term Exercise and a Very High-Fat Diet on Synovial Fluid  
Metabolomics and Joint Structural Phenotypes in Mice:**

**An Integrated Network Analysis**

Alyssa K. Hahn, PhD<sup>1,2,3#</sup>, Albert Batushansky, PhD<sup>4#</sup>, Rachel A. Rawle, PhD<sup>1,5</sup>, Erika Barboza Prado Lopes, PhD<sup>4</sup>, Ronald K. June, PhD<sup>1,2,6\*</sup> and Timothy M. Griffin, PhD<sup>4,7,8\*</sup>

#Authors contributed equally to this work

\*Co-corresponding authors

Content:

- Supplemental Figures S1-S5
- Supplemental Tables S1, S4, S5, S6
- Supplemental Methods and References

Note: Supplemental Tables S2 and S3 are separate excel file attachments

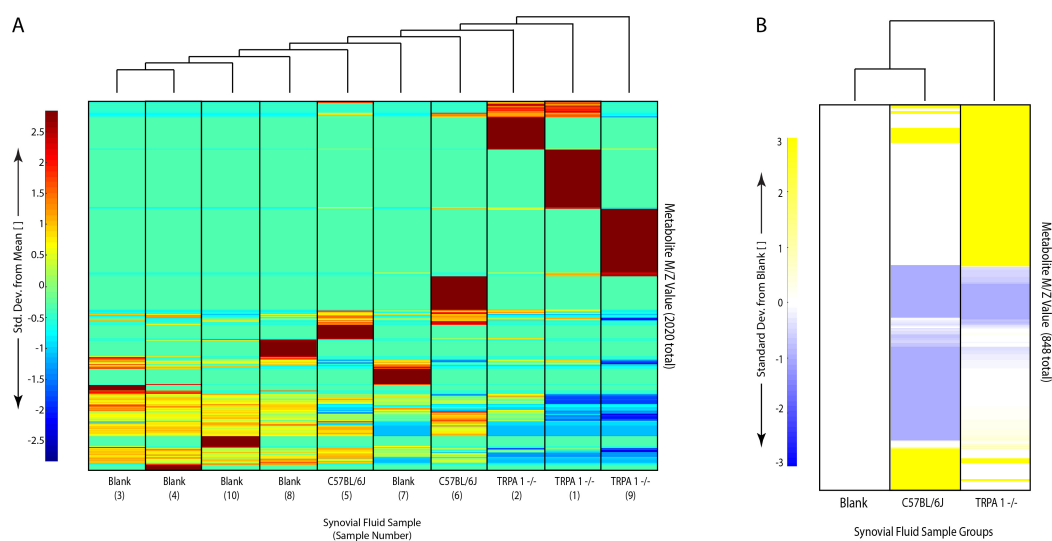

**Figure S1:** HPLC-MS unsupervised metabolomic analysis of 5 murine SF samples (n=2 C57BL/6J and n=3 TRPA1<sup>-/-</sup>) and 5 blank calcium sodium alginate carrier samples processed in parallel and blinded. A) Heatmap clustergram visualization of unsupervised hierarchical cluster analysis based on median m/z metabolic features. Unblinding sample IDs after cluster analysis showed that individual blank and SF samples clustered separately in all but the position of one sample. B) When metabolite features were averaged by group and normalized to the blank, C57BL/6J and TRPA1<sup>-/-</sup> mouse samples showed distinct SF metabolomic features, and both groups differed substantially from blank controls.

36  
37  
38  
39  
40  
41  
42  
43  
44  
45  
46  
47  
48  
49  
50

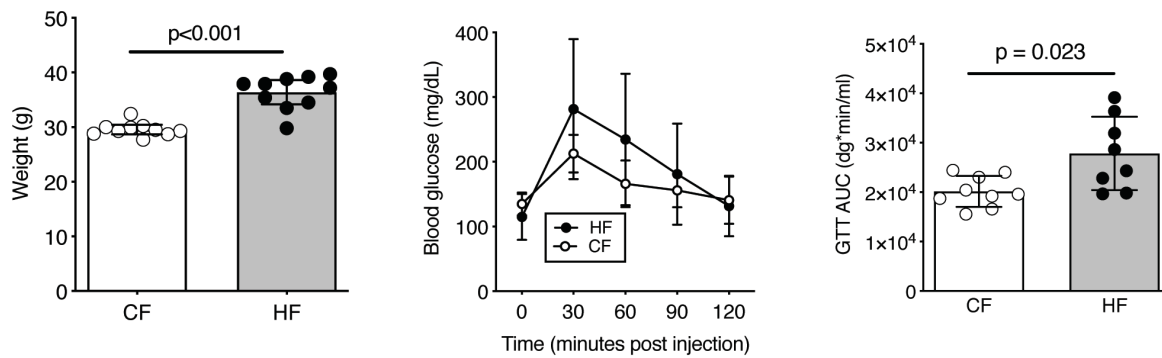

**Figure S2:** HF diet increased body weight and caused mild glucose intolerance prior to assignment to sedentary or wheel running activity groups. Glucose tolerance testing was performed on a subset of animals at 22 weeks of age, which was 16 weeks after the initiation of HF or CF diet treatments.

51  
52  
53  
54  
55  
56  
57  
58  
59  
60  
61  
62  
63  
64  
65

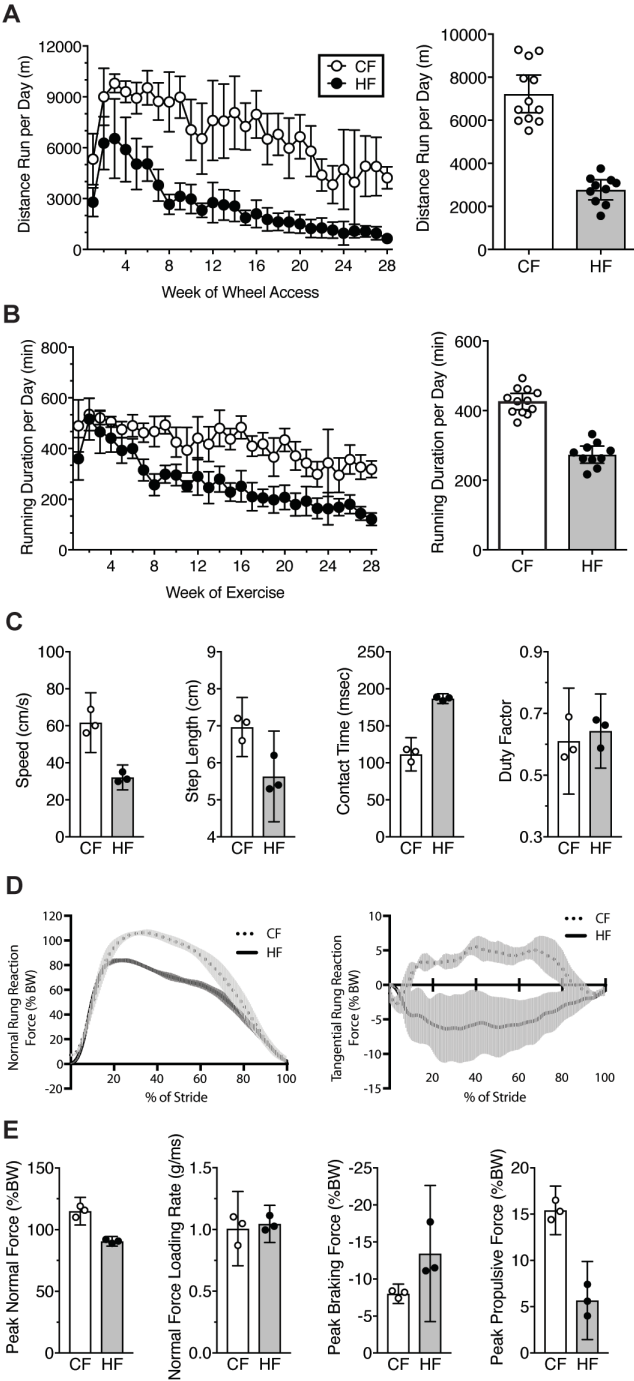

**Figure S3.** Effect of HF diet on voluntary wheel running behavior and gait biomechanics. A. Average daily running distance decreased significantly with HF diet and age (mean +/- 95%CI). B. Daily running duration also reduced with age, especially in animals fed a HF diet (mean +/- 95% CI). C. After 12 weeks of access to running wheels, animals were housed overnight in a custom force-instrumented running wheel to evaluate the effect of a HF diet on gait kinematics and kinetics. HF fed animals ran significantly slower with a shorter step length and longer contact time (mean +/- 95% CI). D. HF diet reduced the force impulse of the normal component of the foot-rung reaction force and altered the pattern of tangential force application from primarily propulsive to braking (mean +/- sd). E. HF diet reduced the peak normal force, expressed as percent body weight (BW), but it did not alter the absolute normal force loading rate. HF diet reduced the peak propulsive forces more than the braking forces (mean +/- 95% CI).

67  
68  
69  
70

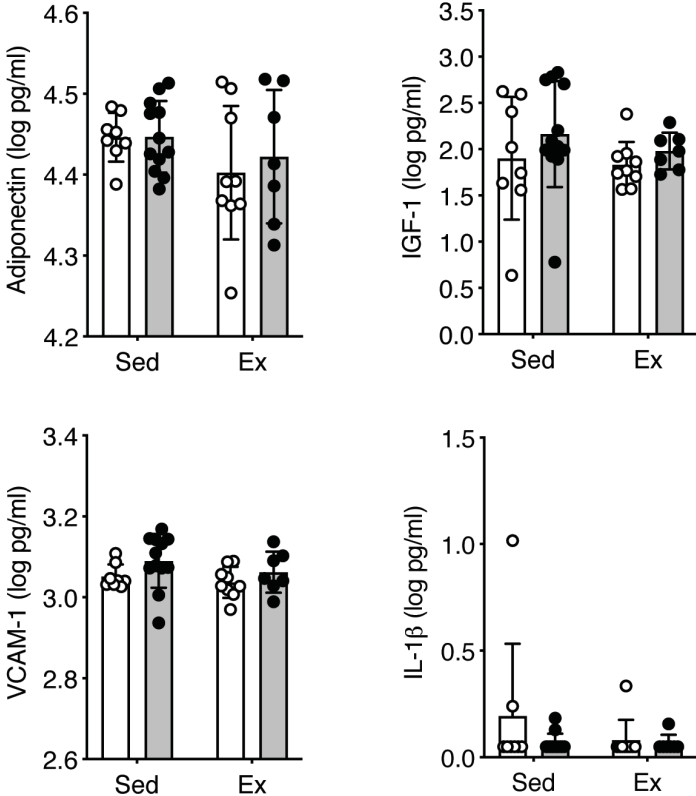

**Figure S4:** Effect of activity and diet on serum proteins. Serum biomarkers were measured at the study endpoint by luminex and ELISA-based assays. Log-transformed data were analyzed by two-factor analysis of variance, with significance defined as  $p < 0.05$ . No significant effects of activity or diet on these serum biomarkers were detected. For all graphs, values are mean  $\pm$  s.d.

71  
72  
73  
74  
75  
76

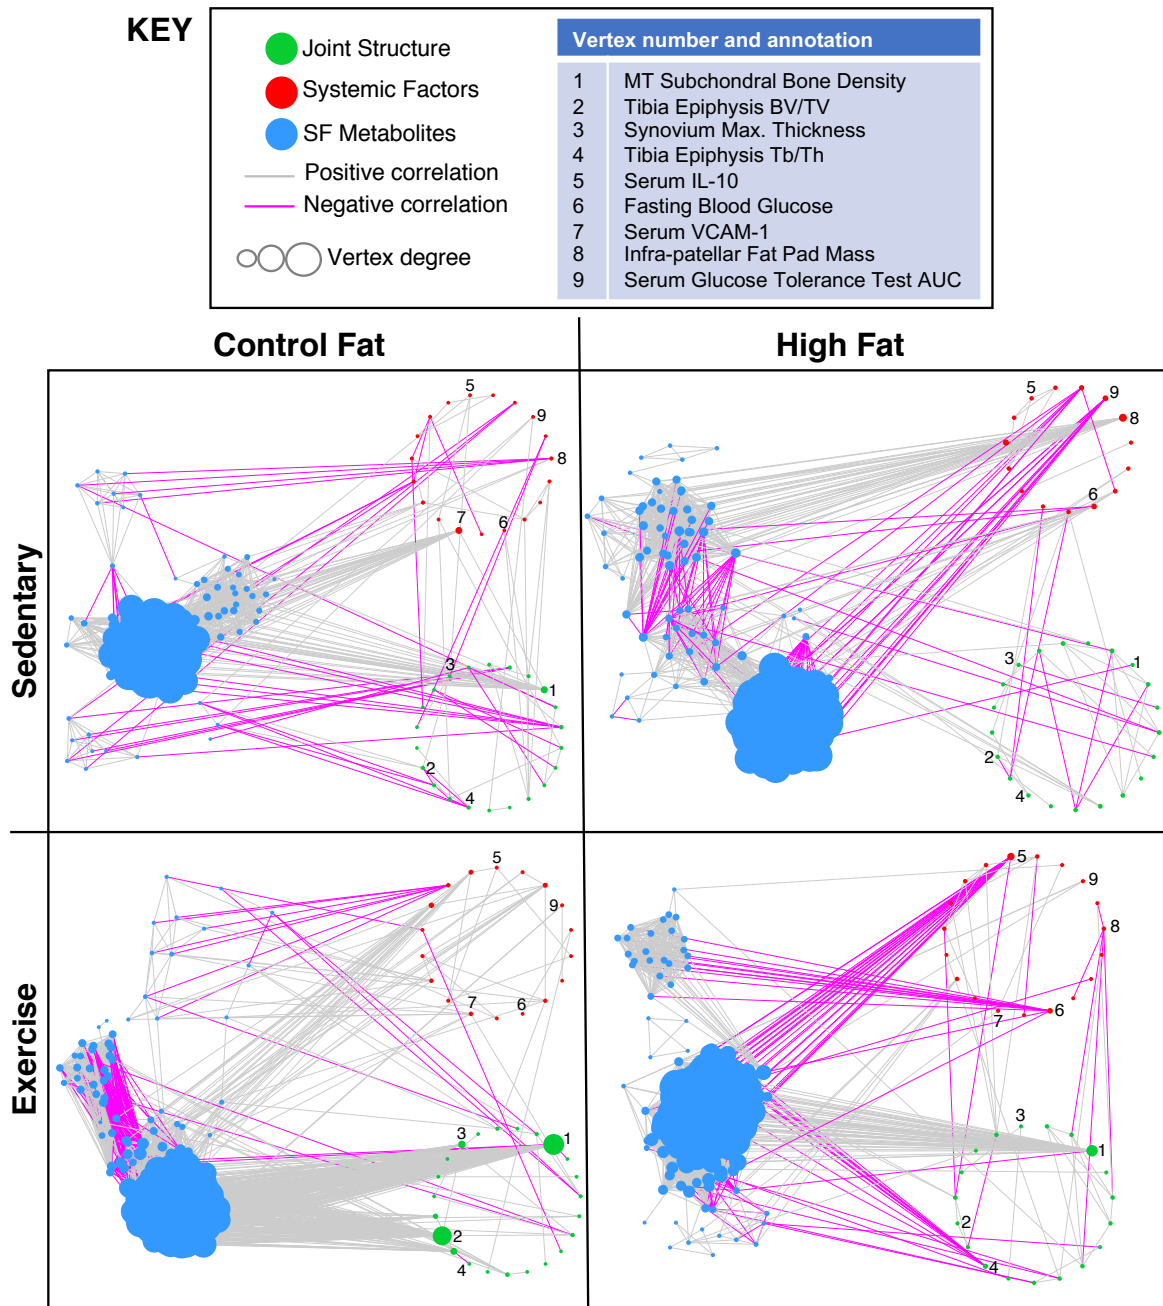

**Figure S5:** Unabridged correlation-based networks for each diet and physical activity treatment group. Each variable (i.e., “vertex”) with  $\geq 1$  significant correlation ( $r > |\pm 0.5|$  and  $qFDR < 0.05$ ) is color-coded as indicated in the figure key and grouped accordingly. The number of significant correlations for each vertex (i.e., vertex degree of connectivity) is indicated by the symbol size, and positive and negative correlations between vertices are indicated by line color as shown in the key. The Joint Structure and Systemic Factor variables with the greatest degree of connectivity in a given network are labeled according to vertex number and variable annotation in the key. Note the distinct effects of HF diet and physical activity on the degree of connectivity between systemic versus joint structural factors and SF metabolites. MT: medial tibia; BV/TV: bone volume to total volume; Tb/Th: trabecular thickness; IL-10: interleukin-10; VCAM-1: vascular cell adhesion molecule-1; AUC: area under the curve.

Running head: Synovial fluid metabolomic network analysis

**Table S1. Summary 2-Factor ANOVA Analyses to Evaluate Diet and Activity Effects on Systemic and Joint Structure Outcomes**

| Figure                                               | Outcome                | Log-transformed? | Diet factor (p value) | Activity factor (p value) | Interaction (p value) |
|------------------------------------------------------|------------------------|------------------|-----------------------|---------------------------|-----------------------|
| 2A                                                   | Body mass              | N                | <0.0001               | 0.0047                    | 0.6887                |
| 2A                                                   | Body fat               | N                | <0.0001               | <0.0001                   | 0.007                 |
| 2A                                                   | Gondadal Fat Pad mass  | N                | <0.0001               | 0.0009                    | 0.0063                |
| 2B                                                   | Fasting blood glucose  | N                | 0.0015                | 0.7207                    | 0.101                 |
| 2B                                                   | GTT AUC                | N                | 0.0007                | 0.9997                    | 0.006                 |
| 2C                                                   | CD45+ PI- cells        | N                | 0.0026                | 0.5188                    | 0.0295                |
| 2C                                                   | CD11c+ cells           | N                | <0.0001               | 0.0224                    | 0.2939                |
| 2C                                                   | CD206+ cells           | N                | <0.0001               | 0.0395                    | 0.7348                |
| 2D                                                   | Leptin                 | Y                | <0.0001               | 0.0044                    | 0.0467                |
| 2D                                                   | IL-8                   | Y                | 0.0045                | 0.4666                    | 0.5503                |
| 2D                                                   | CCL2                   | Y                | <0.0001               | 0.0547                    | 0.6408                |
| 2D                                                   | IL-10                  | Y                | 0.081                 | 0.5944                    | 0.0447                |
| 2D                                                   | IL-6                   | Y                | 0.0619                | 0.3865                    | 0.4086                |
| 2D                                                   | IL-12p70               | Y                | 0.7811                | 0.2925                    | 0.0734                |
| 3A                                                   | Mod. Mankin OA         | N                | 0.0005                | 0.9313                    | 0.867                 |
| 3A                                                   | Cartilage Damage       | N                | 0.0003                | 0.4662                    | 0.7088                |
| 3A                                                   | Saf-O Loss             | N                | 0.0024                | 0.8451                    | 0.6704                |
| 3A                                                   | Tidemark               | Y                | 0.6592                | 0.3116                    | 0.4976                |
| 3A                                                   | Hyp. Chondrocytes      | N                | 0.6546                | 0.0361                    | 0.4591                |
| 3A                                                   | Osteophyte             | N                | 0.7528                | 0.0512                    | 0.4465                |
| 3B                                                   | Max Synovial Thickness | N                | 0.0617                | 0.4765                    | 0.8674                |
| 3B                                                   | Max Synovial Cell Num. | N                | 0.0188                | 0.7238                    | 0.1264                |
| 3B                                                   | IFP mass               | N                | 0.4579                | 0.2179                    | 0.5842                |
| 4A                                                   | Subchon. BMD_LT        | N                | 0.1102                | 0.9903                    | 0.7815                |
| 4A                                                   | Subchon. BMD_MT        | N                | 0.0011                | 0.3364                    | 0.8787                |
| 4A                                                   | Trabecular BMD         | N                | 0.0565                | 0.5857                    | 0.1753                |
| 4B                                                   | Trab. BV/TV            | N                | 0.5679                | 0.5382                    | 0.1814                |
| 4B                                                   | Trab. Con Den.         | N                | 0.0004                | 0.601                     | 0.0095                |
| 4B                                                   | Trab. Thickness        | N                | 0.4498                | 0.1824                    | 0.0644                |
| 4B                                                   | Trab. Seperation       | N                | 0.1134                | 0.3134                    | 0.5763                |
| S2*                                                  | Body mass              | N                | <0.0001               |                           |                       |
| S2*                                                  | GTT AUC                | N                | 0.0234                |                           |                       |
| S4                                                   | Adiponectin            | Y                | 0.6343                | 0.115                     | 0.6477                |
| S4                                                   | IGF-1                  | Y                | 0.2165                | 0.4405                    | 0.7323                |
| S4                                                   | VCAM-1                 | Y                | 0.0744                | 0.2264                    | 0.6973                |
| S4                                                   | IL-1b                  | Y                | 0.2197                | 0.3208                    | 0.3411                |
| *Two-tailed Student's t-test (pre-exercise analyses) |                        |                  |                       |                           |                       |
| Bonferoni-adjusted p-value threshold (0.05/36):      |                        |                  | 0.001388889           |                           |                       |

79  
80  
81  
82  
83  
84  
85  
86  
87

## Running head: Synovial fluid metabolomic network analysis

| <b>Table S4. Network Sensitivity Analysis</b> |                    |                                                              |           |           |           |           |             |              |
|-----------------------------------------------|--------------------|--------------------------------------------------------------|-----------|-----------|-----------|-----------|-------------|--------------|
| <b>Average  r  for the each network</b>       |                    |                                                              |           |           |           |           |             |              |
|                                               |                    | Random exclusion of 1 sample from each network (iteration #) |           |           |           |           |             |              |
| <b>Network</b>                                | <b>All Samples</b> | <b>#1</b>                                                    | <b>#2</b> | <b>#3</b> | <b>#4</b> | <b>#5</b> | <b>mean</b> | <b>stdev</b> |
| CS                                            | 0.901              | 0.858                                                        | 0.931     | 0.922     | 0.920     | 0.925     | 0.911       | 0.030        |
| CE                                            | 0.917              | 0.937                                                        | 0.933     | 0.933     | 0.920     | 0.925     | 0.930       | 0.007        |
| HS                                            | 0.924              | 0.938                                                        | 0.931     | 0.921     | 0.931     | 0.931     | 0.930       | 0.006        |
| HE                                            | 0.910              | 0.921                                                        | 0.919     | 0.920     | 0.922     | 0.926     | 0.922       | 0.003        |

As a test of network robustness, we calculated the average |r| for each network following the random exclusion of 1 sample. This procedure was conducted 5 times for each network.

88  
89  
90  
91  
92  
93  
94



95 **Table S5: Graph Theory-based Network Properties**

| <b>Network</b> | <b>Vertices</b> | <b>Edges<br/>(neg; %)</b> | <b>Density</b> | <b>Diameter</b> | <b>Transitivity</b> |
|----------------|-----------------|---------------------------|----------------|-----------------|---------------------|
| CF-Sed         | 304             | 20778<br>(216; 1.0)       | 0.45           | 13              | 0.84                |
| CF-Ex          | 302             | 18597<br>(255; 1.4)       | 0.41           | 10              | 0.79                |
| HF-Sed         | 299             | 19203<br>(142; 0.7)       | 0.43           | 8               | 0.85                |
| HF-Ex          | 301             | 17786<br>(106; 0.6)       | 0.39           | 12              | 0.79                |

96 Graph theory-based network properties describe the mathematical characteristics of a collection  
97 of vertices and the edges that connect those vertices. "Vertices" refers to the number of variables  
98 in the network with  $\geq 1$  significant correlation, and "Edges" refers the number of significant  
99 correlations between all the vertices in the network. Note that nearly all of the Edges are positive  
100 correlations. "Density" is the number of actual edges present in the network divided by the number  
101 of theoretical potential edges. "Diameter" is the longest of the shortest paths (i.e., minimal number  
102 of edges) between any two vertices, and "Transitivity" is the probability to form sub-networks.

103  
104  
105  
106  
107  
108  
109  
110

111 **Table S6. Group-Specific Coefficient of Variation in Body Composition Outcomes**

| <b>Group</b> | <b>Body mass</b> | <b>Percent Body Fat</b> | <b>Gonadal Fat Pad Mass</b> | <b>Infrapatellar Fat Pad Mass</b> |
|--------------|------------------|-------------------------|-----------------------------|-----------------------------------|
| CF-Sed       | 12.8%            | 15.5%                   | 31.8%                       | 16.3%                             |
| CF-Ex        | 8.2%             | 15.8%                   | 80.0%                       | 15.3%                             |
| HF-Sed       | 8.7%             | 4.5%                    | 17.3%                       | 35.7%                             |
| HF-Ex        | 8.9%             | 6.1%                    | 17.8%                       | 32.4%                             |

112 Coefficient of variation (CV) was most similar across groups for body mass. Percent body fat CV  
 113 was reduced with high-fat (HF) diet. In contrast, HF diet increased the CV for infrapatellar fat  
 114 pad mass. Gonadal fat pad mass CV was most variable among treatment groups, especially  
 115 due to high variance in CF-Ex mice.

116 **Supplemental Methods**

117 Note: Some sections of the supplemental methods are repeated from the main text to  
118 provide context for the additional details.

119 *Animals Treatments and Phenotyping*

120 Mice were housed ≤5 animals per ventilated cage in a temperature-controlled room  
121 maintained at 22 ± 3°C on 14/10-hour light/dark cycles with *ad libitum* access to the  
122 defined HF or CF diet and water. Although the HF diet used in this study, which is  
123 composed of 60% kcal from fat, may not seem clinically relevant, many low-carbohydrate  
124 diets (e.g., ketogenic and related diets) exceed this fat content. In addition, the  
125 ResearchDiets 60% kcal fat diet used in this study is among the most common diet-  
126 induced obesity model systems used in the metabolism field, which is why The Jackson  
127 Laboratory has provided it as a commercially available model for over a decade. Thus,  
128 there is a large database for comparison and interpretation. Nevertheless, it is important  
129 to consider that the use of defined HF diets has limitations and may make it difficult to  
130 detect other diet-specific changes (e.g., dietary sugar or fiber) that also contribute to  
131 phenotypic outcomes<sup>5</sup>.

132 Animals were weighed weekly and received daily inspection and routine veterinary  
133 assessment. At 26 weeks of age, animals not housed with running wheels were single-  
134 housed with nestlet and hut enrichment and defined as sedentary. At 24-wks of age, body  
135 composition was measured in a subset of 10 CF and 10 HF animals with representative  
136 body masses using a dual-energy X-ray absorptiometry (DEXA) system (Lunar PIXImus2;  
137 GE LUNAR Corp., USA) followed by pre-exercise glucose tolerance testing as previously  
138 described<sup>1</sup>. To understand the effect of diet-induced obesity on limb loading in exercise  
139 animals, 3 CF and 3 HF animals were tested after 12 wks of wheel access in a custom-  
140 built force-instrumented running wheel to evaluate gait biomechanics as previously  
141 described<sup>2</sup>. Between 47-49 wks of age, all animals underwent DEXA scanning and  
142 glucose tolerance testing. Following death and blood collection, the epididymal fat pad  
143 was collected for isolation and flow cytometry profiling of adipose tissue immune cells as

144 previously described<sup>1</sup>. The infrapatellar fat pad (IFP) was dissected from the left knee  
145 following SF collection and weighed.

146

#### 147 *Serum Analysis*

148 1-2 animals from each treatment group were transported to the laboratory for a period of  
149 1-2 hours prior to death between 8:30-9:30AM. Animals were killed by rapid decapitation  
150 using a small animal rodent guillotine. Blood was collected following decapitation from the  
151 carotid arteries and allowed to clot in microvette tubes (CB 300 Z, SARSTEDT, Germany)  
152 at room temperature for 20 min and then centrifuged at 10,000g for 5 min. Serum was  
153 aliquoted and frozen at -80°C until analysis. Samples were shipped on dry ice to Dr.  
154 Virginia Kraus's laboratory at Duke University for analysis. Concentrations of IFN- $\gamma$ , IL-  
155 1 $\beta$ , IL-6, IL-10, IL12p70, IL-8 (KC), and TNF- $\alpha$  were measured using the Mouse Pro-  
156 inflammatory Ultra-Sensitive sandwich immunoassay 7-plex kit (#K15012C, MSD, USA).  
157 Samples were run undiluted following manufacturer instructions. The lowest levels of  
158 detection were 0.33 pg/ml for IFN- $\gamma$ , 1.12 pg/ml for IL-1 $\beta$ , 20.2 pg/ml for IL-6, 1.98 pg/ml  
159 for IL-10, 39.7 pg/ml for IL12p70, 2.58 pg/ml for IL-8, and 0.334 pg/ml for TNF- $\alpha$ . The  
160 intra-assay coefficients of variation (CVs) were 3.2% for IFN- $\gamma$ , 3.2% for IL-1 $\beta$ , 4.7% for  
161 IL-6, 4.0% for IL-10, 1.8% for IL12p70, 5.1% for IL-8, and 2.3% for TNF- $\alpha$ . Concentrations  
162 of adiponectin were measured in serum diluted 1:1000 following manufacturer  
163 instructions (#K0013182, MSD). The lowest level of detection was 0.04 ng/ml, and the  
164 intra-assay CV was 5.7%. Concentrations of IGF-1 were measured in serum diluted 1:500  
165 following manufacturer instructions (#MG100, R&D, USA). The minimal detectable dose  
166 was 3.5 pg/ml, and the intra-assay CV was 2.0%. Concentrations of leptin were measured  
167 in serum diluted 1:20 following manufacturer instructions (#MOB00, R&D). The minimal  
168 detectable dose was 22 pg/ml, and the intra-assay CV was 3.9. Concentrations of the  
169 chemokine CCL2, also known as MCP-1, were measured in serum diluted 1:2 following  
170 manufacturer instructions (#MJE00, R&D). The minimal detectable dose was <2 pg/ml,  
171 and the intra-assay CV was 4.2%. Concentrations of VCAM-1 were measured in serum

172 diluted 1:50/1:500 following manufacturer instructions (#MVC00, R&D). The minimal  
173 detectable dose was 30 pg/ml, and the intra-assay CV was 2.8%.

174

#### 175 *Joint Structural Analysis*

176 Following death, the right hind limb was isolated and prepared for high-resolution micro-  
177 computed tomography (CT) scanning using a vivaCT 40 scanner (Scanco Medical,  
178 Basserdorf, Switzerland) as previously described<sup>3</sup>. Subchondral bone and proximal tibial  
179 epiphyseal trabecular bone density and morphology were evaluated following a previous  
180 protocol<sup>4</sup>. Joints were trimmed of muscle, rinsed, and decalcified using Cal-Ex™  
181 decalcifying solution (ThermoFisher Scientific, USA) for 3 days at 4°C. Knees were  
182 dehydrated in an ethanol gradient and paraffin embedded for sagittal sectioning. Slides  
183 were stained with hematoxylin, Fast Green, and Safranin-O for histological grading as  
184 described previously<sup>1</sup>. Briefly, two experienced graders evaluated multiple stained  
185 sections from the medial and lateral joint compartments. Slides were organized by animal,  
186 randomized by treatment, and assigned a temporary identification code to blind graders  
187 to group assignment. Each grader independently assigned Modified Mankin OA scores  
188 separately for the medial tibia, medial femur, lateral tibia, and lateral femur, with a  
189 maximal site-specific score of 24. If needed, divergent scores were re-evaluated and  
190 reconciled between graders before averaging the values from each grader and unblinding  
191 the sample IDs. Osteophyte severity and synovial pathology were evaluated as previously  
192 described<sup>5</sup>. Modified Mankin OA outcomes were previously reported for Sedentary CF  
193 and HF animals<sup>1</sup>.

194

#### 195 *Synovial Fluid Metabolomics*

196 SF was collected from the left knee immediately following death using the calcium sodium  
197 alginate compound method as previously described<sup>6</sup>. Briefly, the joint capsule was  
198 opened superior to the patella with an anterior incision, which was extended medially and

199 laterally along the patellar tendon to insert a 2 mm diameter Melgisorb wound dressing  
200 (Tendra, REF 250600; Goteborg, Sweden) into the joint cavity. The joint was flexed  
201 approximately 15 times, and then the SF-soaked Melgisorb was removed and digested  
202 in 35  $\mu$ l of alginate lyase in H<sub>2</sub>O (1 unit/mL derived from Flavobacterium, Sigma-Aldrich  
203 A1603-100MG) for 30 min at 34°C. 15  $\mu$ l of 1.0M sodium citrate (C<sub>6</sub>H<sub>5</sub>Na<sub>3</sub>O<sub>7</sub>) was added  
204 prior to freezing at -80°C until metabolomic analysis. Samples were shipped on dry ice to  
205 the June Laboratory for further processing. Proteins were precipitated with acetone, and  
206 metabolites were extracted using 50:50 water:acetonitrile following previously established  
207 protocols<sup>7</sup>. Metabolite extracts were analyzed in positive mode using an Agilent 1290  
208 UPLC system connected to an Agilent 6538 Q-TOF mass spectrometer (Agilent Santa  
209 Clara, CA). Metabolites were separated on a Cogent Diamond Hydride hydrophilic  
210 interaction chromatography (HILIC) 150 x 2.1 mm column (MicroSolv, Eatontown, NJ) in  
211 normal phase using optimized elution methods previously reported <sup>7</sup>. LC-MS data were  
212 converted from Agilent's proprietary [.d] files to mzXML files using ProteoWizard's  
213 MSConvert program. Mass spectra were then processed using MZMine 2.14 for peak  
214 detection, noise threshold (1000), retention time and mass-to-charge (m/z) ratio  
215 normalization, and alignment of peaks<sup>8</sup>. Output data contained all detected m/z values  
216 and corresponding relative abundance of each m/z value. M/z values are referred to in  
217 this study as metabolite features.

218

### 219 *Data Analytics and Statistics*

220 Group sample sizes ( $n=10$ ) were based on variance estimates from previous studies and  
221 a desire to detect a 30% difference in the mean modified Mankin OA score due to diet or  
222 exercise with  $\geq 80\%$  power at a significance level of  $p=0.05$ . Additional animals were  
223 included in each group to maintain statistical power in case of unexpected death.  
224 However, 3 animals assigned to the exercise cohort in each diet and one HF-sedentary  
225 animal died during the course of the experiment due to undetermined causes, resulting  
226 in the following final group sizes: CF-Sed ( $n=12$ ), CF-Ex ( $n=9$ ), HF-Sed ( $n=13$ ), HF-Ex  
227 ( $n=9$ ). The sample sizes for some specific outcomes were smaller due to technical

228 problems and are indicated in the figure legend. Pre-exercise diet treatments were  
229 analyzed by two-tailed Student's t-test, and diet and exercise treatment effects were  
230 evaluated by two-way ANOVA. Data that did not meet test assumptions for  
231 homoscedasticity or normality of residuals were log-transformed. Tests showing a  
232 significant effect of diet, exercise, or interaction effects ( $p < 0.05$ ) were followed up with  
233 multiple-comparison post-hoc tests to identify individual group differences as specified in  
234 figure legends. Statistical tests were conducted using the software Prism 8.4.3 for Mac  
235 OS X.

236 For SF metabolomic analysis, metabolite features with a median intensity value of zero  
237 across all experimental groups were removed from the analysis. Remaining intensity  
238 values of zeroes were considered below the detection limit and thus replaced with one-  
239 half the minimum intensity value identified in the dataset<sup>9</sup>. This resulted in 1.6% of the  
240 overall metabolites being replaced with one half the minimum intensity values. Statistical  
241 analyses were completed in MATLAB (Mathworks, Inc.) and MetaboAnalyst<sup>9</sup>. Data  
242 processing included normalizing by the median, log transformation, and standardization  
243 (mean-centered divided by standard deviation) to correct for non-normal distributions.  
244 Normalization to the median for each metabolite reduces potential technical variability  
245 between samples. Log transformation and standardization enable quantitative  
246 comparison of the abundance levels between distinct metabolites. Hierarchical cluster  
247 analysis was used as an unsupervised clustering method to illustrate natural clustering of  
248 cohorts based on median metabolite intensities for each cohort to visualize the global  
249 metabolomic profiles. Differences between cohorts were determined by fold-change  
250 analysis (employed prior to normalization) and FDR-corrected two-tailed Student's T-  
251 Tests using MetaboAnalyst. These were calculated on raw data before normalization to  
252 compare the absolute differences, which can be skewed by normalization. To preserve  
253 the magnitude of the differences, fold changes were calculated based on the raw mean  
254 metabolite intensities between the control and exercised groups. Two-tailed T-Tests were  
255 used to calculate p-values for pairwise comparisons between experimental groups. 2-  
256 way ANOVA was not an available option for data analysis in MetaboAnalyst, which  
257 prevented us from considering interaction effects in the analysis. Volcano plots show

258 between-group comparisons of metabolite features, with preliminary discovery cut-off  
259 values of  $p_{FDR} < 0.1$  and  $\geq 2$  FC. The rationale for the fold change threshold of 2 is that  
260 many metabolites are capable of allosteric regulation which has dramatic effects on  
261 enzyme activity.

262

263

#### 264 *Correlation Network Analysis*

265 Correlation-based networks were constructed for each diet and physical activity condition  
266 separately using previously published methods<sup>12</sup>. Data sets for joint structure outcomes  
267 (24 variables), systemic metabolic and inflammatory outcomes (19 variables), and SF  
268 metabolite levels (264 variables) were obtained for the same animals and integrated  
269 (Supplemental Table 1). The number of SF metabolites included in the correlation-based  
270 network analyses was obtained after filtering out features with  $< 90\%$  detected values  
271 across all samples to avoid artificial correlations that can be caused by high data  
272 imputation. Next, individual missing values were imputed using “MICE” (Multivariate  
273 Imputation via Chained Equations) package<sup>13</sup> for R-project<sup>14</sup>. MICE performs multiple  
274 imputations of missing values based on other observed values, assuming that missing  
275 values are random. We used the ‘pmm’ method that replaces missing values by predictive  
276 mean matching based on the other values. The portion of missing values was  $< 5\%$  of  
277 the total sample feature values, and only 1 missing value was imputed per sample feature  
278 per experimental group. Activity related data, such as running distance and duration, were  
279 excluded from the network analyses to unify the number of starting variables among all  
280 four groups. Next, diet- and activity-specific Pearson’s correlation matrices were  
281 calculated for all samples from each group using the R “psych” package<sup>15</sup>. In parallel,  
282 significance tests with FDR correction for MHT for Pearson’s r-values were performed.  
283 Only correlation coefficients with  $r > |\pm 0.5|$  and  $q_{FDR} < 0.05$  were considered as significant  
284 and used for network construction. We considered Spearman correlations to minimize  
285 potential outlier influences, but we considered Pearson’s more robust considering that the



286 metabolomics data were normalized, scaled and transformed. We wanted to avoid  
287 another data manipulation (ordering) to decrease the potential for spurious correlations.  
288 To minimize the potential effect of outlier-driven correlations on our conclusions, we  
289 focused our discussion on robust sub-networks with high connectivity. In addition, the  
290 same analysis method was applied to all four groups so that any outlier effects would  
291 similarly influence the four networks. We did not conduct any additional multivariate  
292 analyses since our goal was to compare networks using a consistent approach rather  
293 than attempting to optimize the network model for each condition. To test the robustness  
294 of the network, we calculated the average  $|r|$  for each network following the random  
295 exclusion of 1 sample. This procedure was conducted 5 times for each network. The  
296 Table S4 shows minimal changes in  $|r|$  for each network, supporting the robustness of  
297 the findings.

298 Networks were visualized in Cytoscape<sup>16</sup>. Graph theory-based network properties and  
299 odds ratio analyses were calculated in R using “iGraph” package<sup>17</sup> and built-in functions,  
300 respectively. Features that formed sub-networks with high connectivity were tentatively  
301 annotated and mapped to metabolic pathways using MetaboAnalyst on-line tools (38) on  
302 KEGG data-base<sup>18</sup>. In addition, Dijkstra’s algorithm was used to find the shortest path  
303 between body weight and modified Mankin OA score in the network of each diet-activity  
304 group. To employ Dijkstra’s algorithm<sup>19</sup>, correlation coefficient edge weights were first  
305 converted to a distance weights by formula  $1-r^2$ , where  $r$  is a correlation coefficient  
306 between any pair of vertices. Next, the Dijkstra’s algorithm was employed using “iGraph”  
307 package for R<sup>17</sup>: “all\_shortest\_paths” function, diameter: “diameter” function, density:  
308 “edge\_density” function, transitivity: “transitivity” function. The number of vertices and  
309 edges (positive and negative) were directly extracted from Cytoscape. The R-code and  
310 general workflow for the network construction were performed as previously published<sup>12</sup>  
311 Dijkstra’s algorithm can be applied for positive values only. Therefore, the sign of  
312 correlation in the network was ignored to calculate the shortest paths, but positive and  
313 negative correlations are still indicated in the figure.

314

315 **Supplemental References**

- 316 1. Barboza E, Hudson J, Chang W-P, et al. Profibrotic Infrapatellar Fat Pad  
317 Remodeling Without M1 Macrophage Polarization Precedes Knee  
318 Osteoarthritis in Mice With Diet-Induced Obesity. *Arthritis & Rheumatology*.  
319 2017;69(6):1221-1232. doi:10.1002/art.40056.
- 320 2. Roach GC, Edke M, Griffin TM. A novel mouse running wheel that senses  
321 individual limb forces: biomechanical validation and in vivo testing. *Journal of*  
322 *Applied Physiology*. 2012;113(4):627-635.  
323 doi:10.1152/jappphysiol.00272.2012.
- 324 3. Griffin TM, Batushansky A, Hudson J, Lopes EBP. Correlation network  
325 analysis shows divergent effects of a long-term, high-fat diet and exercise on  
326 early stage osteoarthritis phenotypes in mice. *J Sport Health Sci*.  
327 2020;9(2):119-131. doi:10.1016/j.jshs.2019.05.008.
- 328 4. Griffin TM, Huebner JL, Kraus VB, Guilak F. Extreme obesity due to  
329 impaired leptin signaling in mice does not cause knee osteoarthritis. *Arthritis*  
330 *Rheum*. 2009;60(10):2935-2944. doi:10.1002/art.24854.
- 331 5. Donovan EL, Lopes EBP, Batushansky A, Kinter M, Griffin TM. Independent  
332 effects of dietary fat and sucrose content on chondrocyte metabolism and  
333 osteoarthritis pathology in mice. *Dis Model Mech*. 2018;11(9):dmm034827.  
334 doi:10.1242/dmm.034827.
- 335 6. Seifer DR, Furman BD, Guilak F, Olson SA, Brooks SC III, Kraus VB. Novel  
336 synovial fluid recovery method allows for quantification of a marker of  
337 arthritis in mice. *Osteoarthritis Cartilage*. 2008;16(12):1532-1538.  
338 doi:10.1016/j.joca.2008.04.013.
- 339 7. Carlson AK, Rawle RA, Adams E, Greenwood MC, Bothner B, June RK.  
340 Application of global metabolomic profiling of synovial fluid for osteoarthritis  
341 biomarkers. *Biochemical and Biophysical Research Communications*.  
342 2018;499(2):182-188. doi:10.1016/j.bbrc.2018.03.117.
- 343 8. Pluskal T, Castillo S, Villar-Briones A, Oresic M. MZmine 2: modular  
344 framework for processing, visualizing, and analyzing mass spectrometry-  
345 based molecular profile data. *BMC Bioinformatics*. 2010;11:395.  
346 doi:10.1186/1471-2105-11-395.
- 347 9. Chong J, Soufan O, Li C, et al. MetaboAnalyst 4.0: towards more  
348 transparent and integrative metabolomics analysis. *Nucleic Acids Res*.  
349 2018;46(W1):W486-W494. doi:10.1093/nar/gky310.

- 350 10. Guijas C, Montenegro-Burke JR, Domingo-Almenara X, et al. METLIN: A  
351 Technology Platform for Identifying Knowns and Unknowns. *Anal Chem.*  
352 2018;90(5):3156-3164. doi:10.1021/acs.analchem.7b04424.
- 353 11. Li S, Park Y, Duraisingham S, et al. Predicting network activity from high  
354 throughput metabolomics. *PLoS Comput Biol.* 2013;9(7):e1003123.  
355 doi:10.1371/journal.pcbi.1003123.
- 356 12. Batushansky A, Toubiana D, Fait A. Correlation-Based Network Generation,  
357 Visualization, and Analysis as a Powerful Tool in Biological Studies: A Case  
358 Study in Cancer Cell Metabolism. *BioMed Research International.*  
359 2016;2016:8313272. doi:10.1155/2016/8313272.
- 360 13. van Buuren S, Groothuis-Oudshoorn K. mice: Multivariate Imputation by  
361 Chained Equations in R. *Journal of Statistical Software.* 2011;45(3).  
362 doi:10.18637/jss.v045.i03.
- 363 14. Team RC. R: A language and environment for statistical computing. 2014.  
364 <http://www.R-project.org/>.
- 365 15. Revelle WR. psych : Procedures for Personality and Psychological  
366 Research.
- 367 16. Shannon P, Markiel A, Ozier O, et al. Cytoscape: a software environment for  
368 integrated models of biomolecular interaction networks. *Genome Res.*  
369 2003;13(11):2498-2504. doi:10.1101/gr.1239303.
- 370 17. Csárdi G, Nepusz T. The igraph software package for complex network  
371 research. In: *Complex Systems.* 2006; 1695. <https://igraph.org>.
- 372 18. Kanehisa M, Sato Y, Kawashima M, Furumichi M, Tanabe M. KEGG as a  
373 reference resource for gene and protein annotation. *Nucleic Acids Res.*  
374 2016;44(D1):D457-D462. doi:10.1093/nar/gkv1070.
- 375 19. Dijkstra EW. A note on two problems in connexion with graphs. *Numer Math.*  
376 1959;1(1):269-271. doi:10.1007/BF01386390.

377
